# Supplementary material for: Indication of Horizontal DNA Gene Transfer by Extracellular Vesicles
Source: PubMed Central journal article supplement (PMC5042424; doi:10.1371/journal.pone.0163665), 2016-09-29
Supplement: pone.0163665.s001.pdf [file pone.0163665.s001.pdf]

**a**

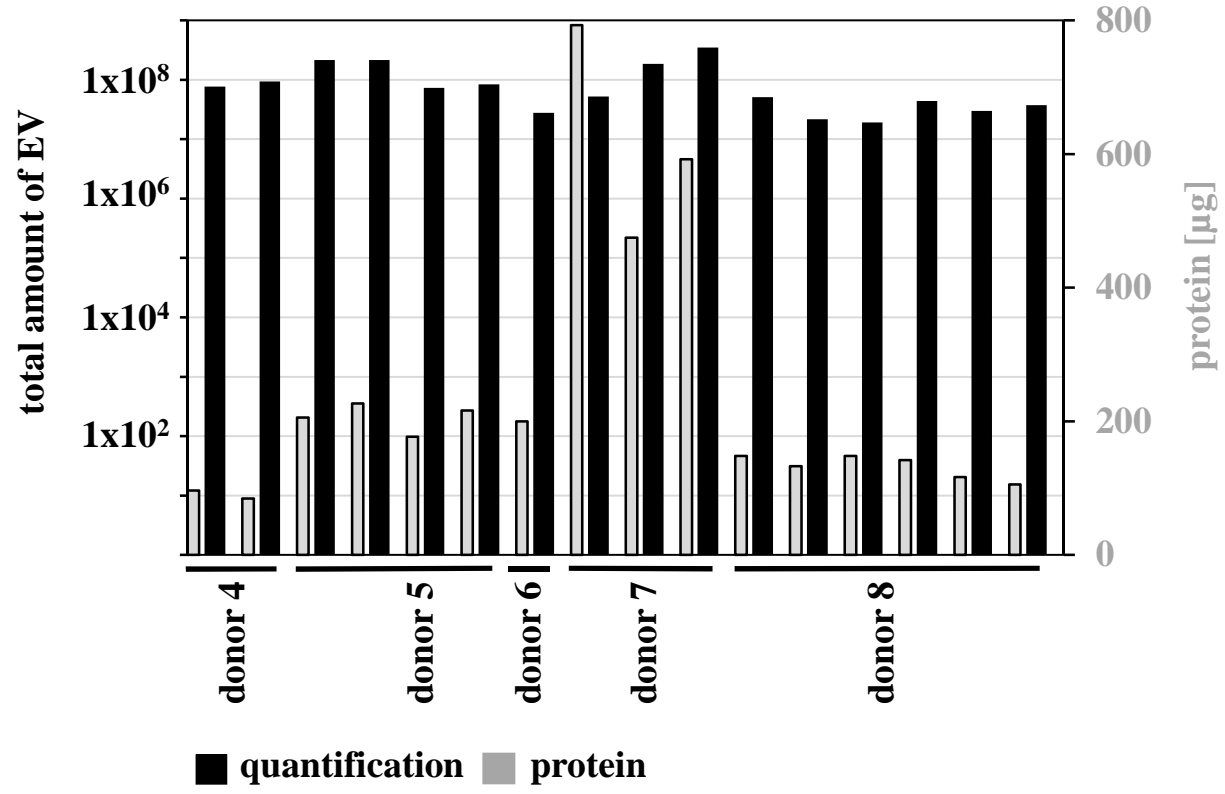

**b EV quantification**

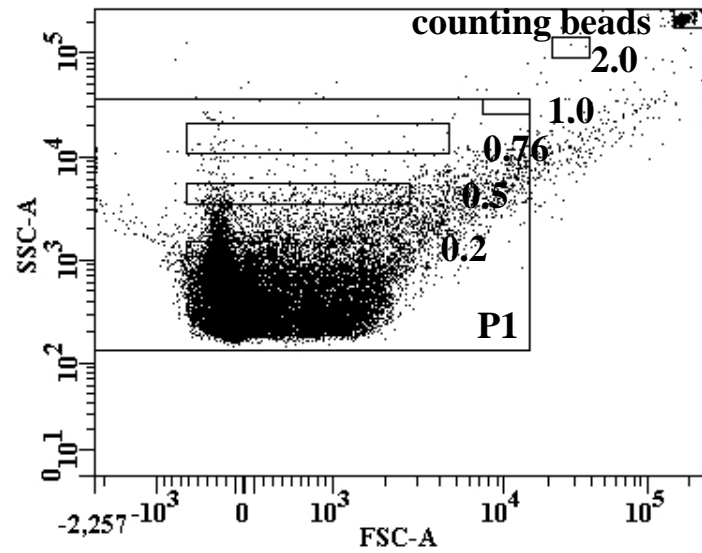

**c**

| EV without DNase digestion<br>[ng/10 <sup>6</sup> producer cells] | EV with DNase digestion<br>[ng/10 <sup>6</sup> producer cells] |
|-------------------------------------------------------------------|----------------------------------------------------------------|
| 24.38 ± 9.04                                                      | 5.09 ± 3.95                                                    |

**d**

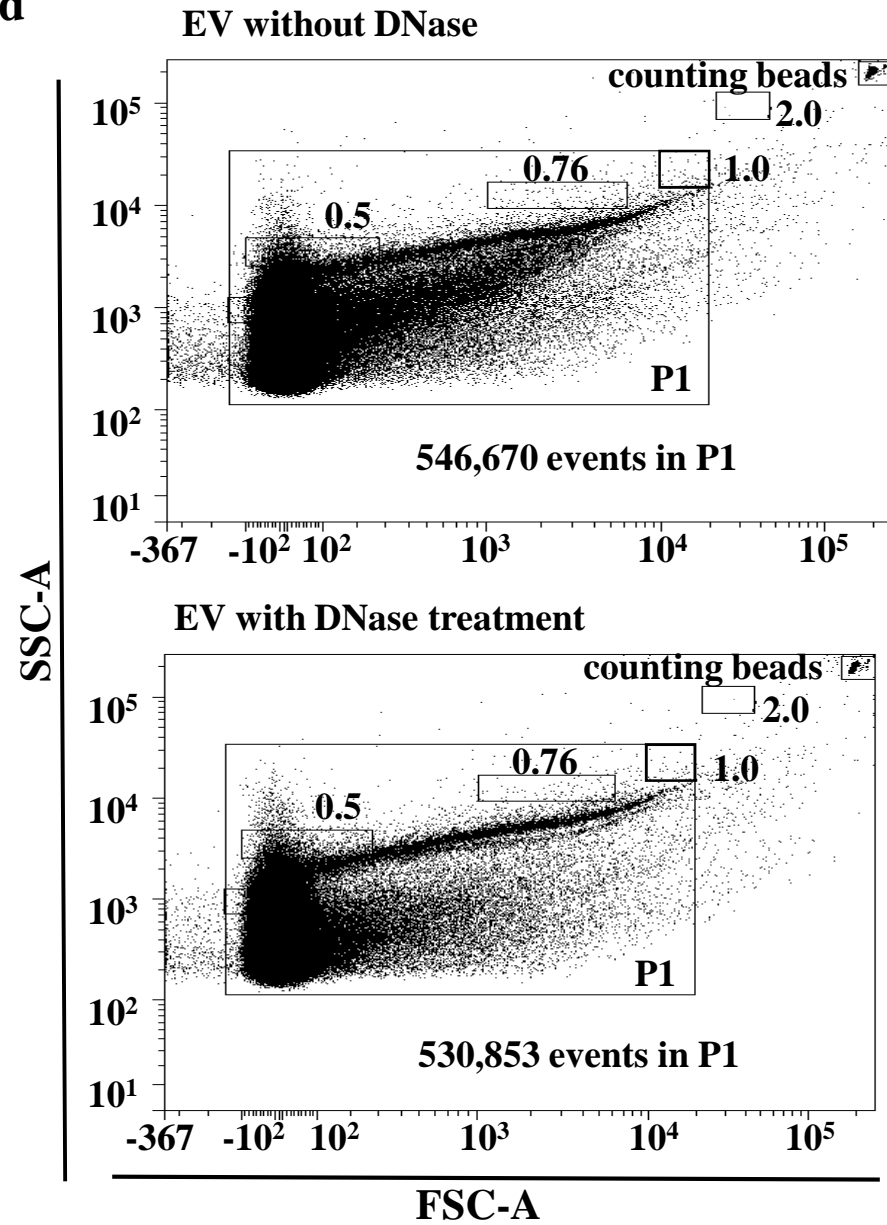

S1 Fig.
