# Supplementary material for: Indication of Horizontal DNA Gene Transfer by Extracellular Vesicles
Source: PubMed Central journal article supplement (PMC5042424; doi:10.1371/journal.pone.0163665), 2016-09-29
Supplement: pone.0163665.s005.pdf [file pone.0163665.s005.pdf]

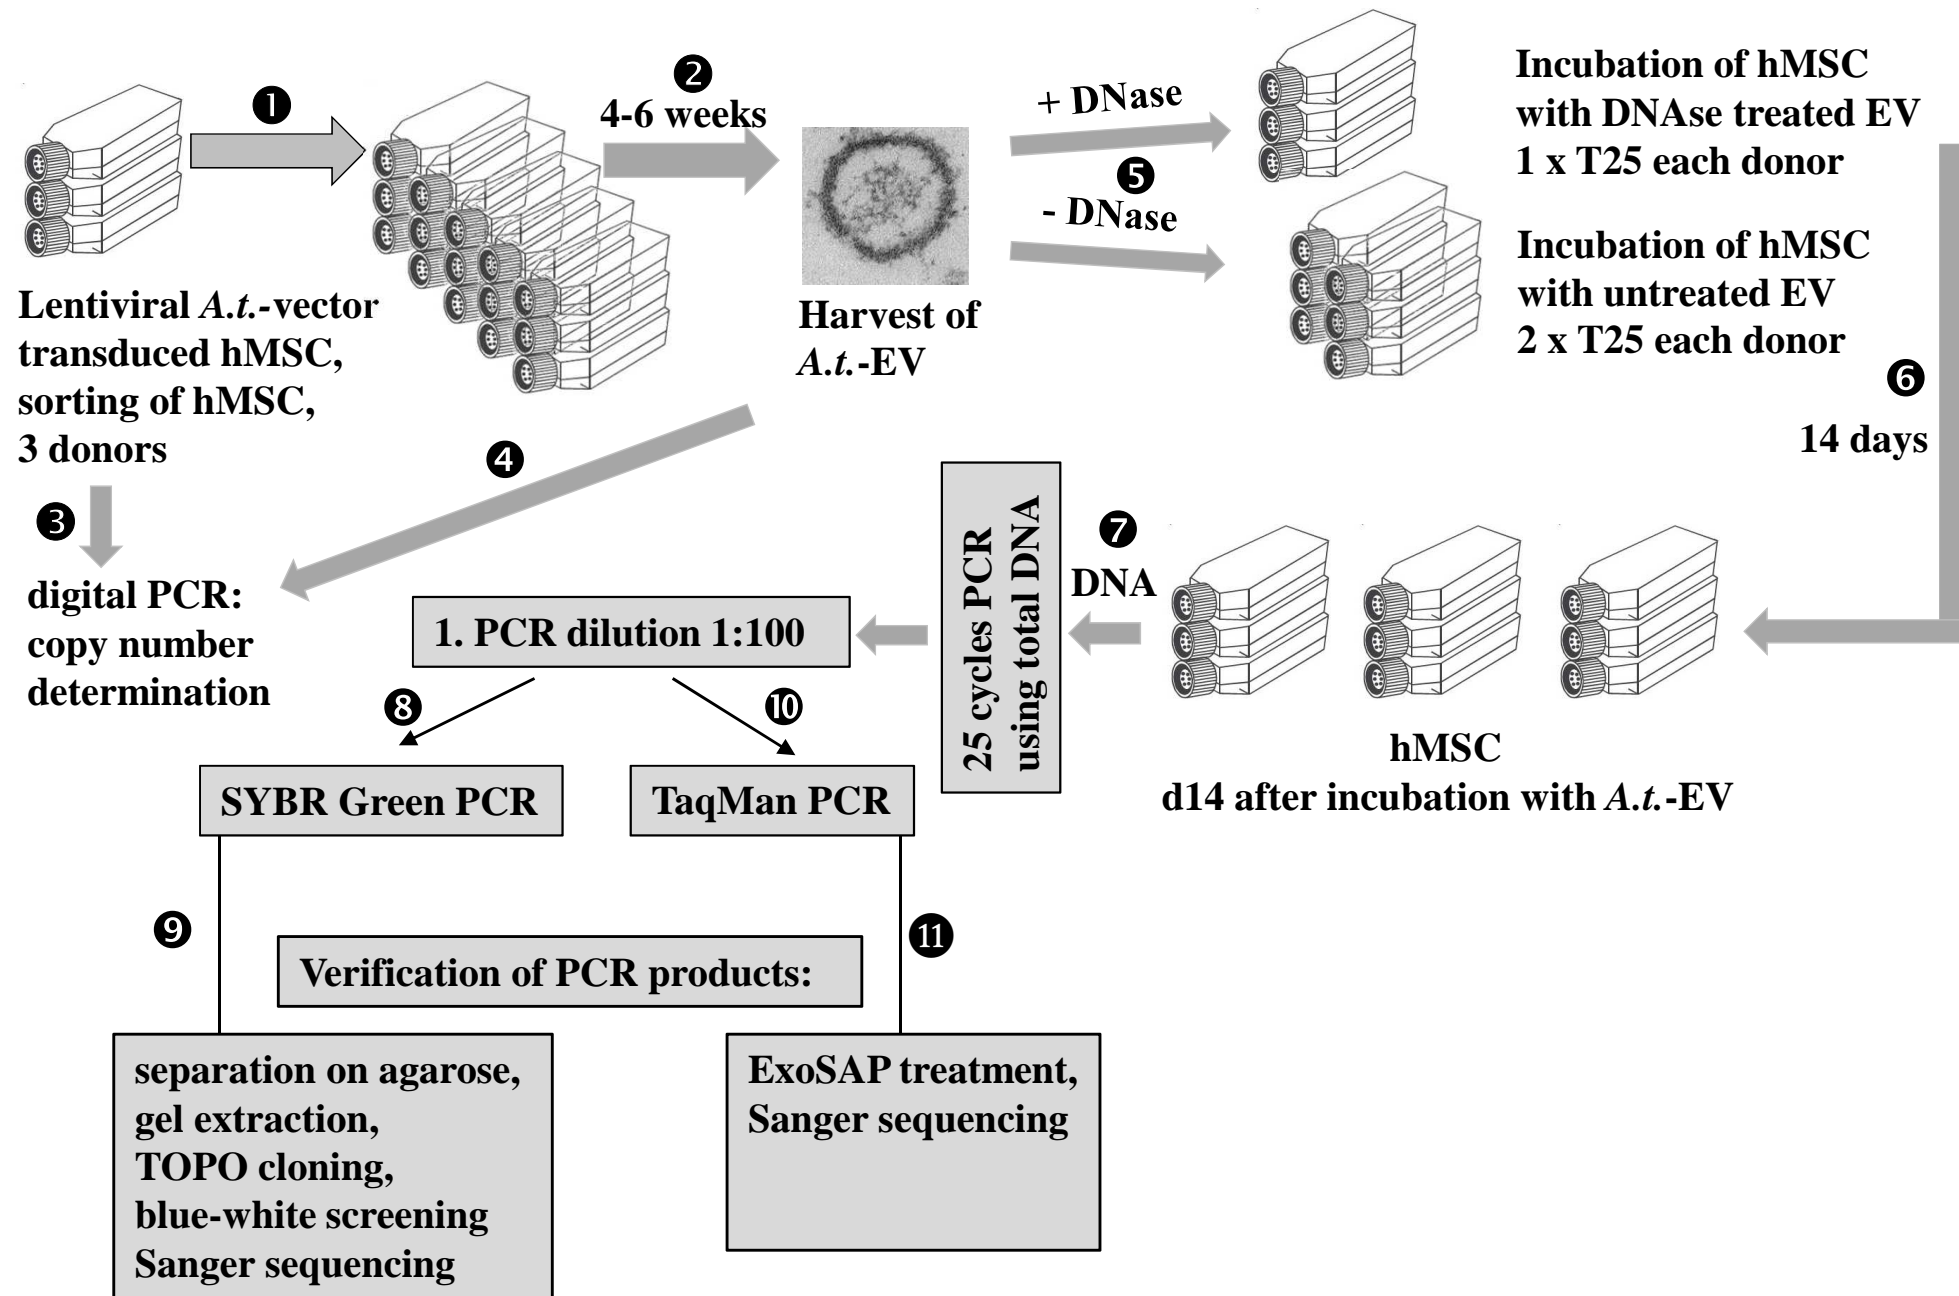

S5 Fig.
